# Supplementary material for: A broadly neutralizing macaque monoclonal antibody against the HIV-1 V3-Glycan patch
Source: eLife. 2020 Oct 21;9:e61991. doi: 10.7554/eLife.61991 (PMC7577740; doi:10.7554/eLife.61991)
Supplement: Figure 1—source data 1. [file elife-61991-fig1-data1.xlsx]

## Sheet: Sequences
		Ab ID	IGH VDJ (nt)	IGL VJ (nt)
		1485	CAGGTGCAGCTGCAGGAGTCGGGCCCAGGACTGGTGAAGCCTTCGGAGACCCTGTCCCTCACCTGCACTGTCTCTGGTTATAACATCAGAAGTAATAATTGGTGGAGTTGGGTCCGCCAGCCCCCAGGGAAAGGGCTGGAGTGGATTGGGGGTGTCTACGCTAATAGTGAGATCACCAACTACAACTCCTCCCTCAAAAGTCGAGTCAGCATCTCACAAGACGCGTGGAGAAATAAATTCTCCTTGAAGCTGAAGTCTGTGACCGACGCGGACACGGCCGTGTATTACTGTGTGAGAGGACCCAATCATTGGGAATATTTTGATAGTGGTAACAATGAATATTTCGAATTCTGGGGCCAGGGCGCCCTGGTCACCGTCTCCTCAG	CAGTCTGTGCTGACTCAGCCGCCCTCAGTGTCTGGGGCCCCAGGCCAGAGGGTCACCATCTCCTGCACTGGGACCAGTTCCAACATTGAAAATTATCATGCATTCTGGTACCAGCAATTCTCAGGAATGGCCCCCAAACTCCTCATCCGTGACAATGATAAGCGACCTTCAGGGGTTTCTGACCGATTCTCTGGCTCCAAGTCTGGTGCCTCAGCCTCCCTGACCATCACTGGGCTCCAGACTGACGATGAGGCTGATTATTACTGCCAGTCTTATGACAGCGGCCTGAGAAGTTACATCTTCGCTTCTGGGACCCGGCTCACCGTCCTAG
		1508	GAGGTGCAGCTGGTGGAGTCTGGGGGCGGCTTGGCGAAGCCTGGGGGGTCCCTGAGACTCTCCTGCACAGTCTCTGGATTCAATTTCAATGGTTACTTCATGTACTGGGTCCGCCAGGCTCCAGGGAAGGGGCTGGAGTGGGTCTCAAGTAGTGGTTACACTGGCAGTACAACATACTATGCAGACTCCGTGAAGGGCAGATTTACCATTTCCAGGGAGAACGCCAAGAACAGACTGCATCTTCAAATGGACAGCCTGAGAGTTGAGGACACGGCTGTCTATTACTGTGTGAGAGATTCGATTCCTCGTGACTATCGATTCGATGGCTGGGGTCCGGGAGTCCTGGTCACCGTCTCCTCAG	CAGTCTGNGNTGACTCAGCCTCCCTCAATGTCTGGGTCTCCTGGACAGGCGGTCACCATCTCCTGCATTGGAACCAACAGTGACATTGGTCGTTCTAACCATGTCTCCTGGTACCAACACCACCCAGGCAAAGCCCCCAAACTCTTGATTTTTGAGGTCAATAAGCGGCCCTCAGGGGTCTCTGATCGCTTCTCTGGCTCCAAGTCTGGCACCACGGCCTCCCTGACCATCTCTGGACTCCAGACTGAGGATGAGGCTGATTATTACTGCAACTCATATGCAGGCACCAACACTTTCATTTTCGGTTCTGGGACCCGACTCACCGTCCTAG
		1490	GAGGTGCAGCTGGTGGAGTCTGGGGGCGGCTTGGCGAAGCCGGGGGGGTCCCTGAGACTCTCCTGTACAGTCTCTGGATTCAACTTCAATGGCTACTACATATACTGGGTCCGCCAGGCTCCAGGGAAGGGGCTGGAATGGATCTCCAGTGTTAGTTATACTGGTGGGAAGACATTCTATGCAGACTCCGTGAGGGGCAGATTCACCGTTTCCAGAGAGAACGCCAAGAAGACAGTACATCTTCAAATGGACAGCCTGAGAGTGGAGGACACGGCTATCTATTACTGTGTGAGAGATTCGATTCCTCGTGACTATCGGTTCGATGGCTGGGGCCCGGGAGTCCTGGTCACCGTCTCCTCAG	CAGTCTGTGCTGACTCAGCCTCCCTCAATGTCTGGGTCTCCTGGACAGTCGGTCACCATCTCCTGCACTGGAACCAGGAGTGACATTGGTGGTTATAACCGTGTCTCCTGGTACCAACAGCACCCAGGCAAAGCCCCCAAACTCTTGATTTATGAGGTCAGTAAGCGGCCCTCAGGGGTCTCTAATCGCTTCTCTGGCTCCAAGTCTGGCAACACGGCCTCCCTGACCATCTCTGGGCTCCAGGCTGCGGATGAGGCTGATTATTACTGCAACTCATATGCAGGCACCGACACTTTCATATTCGGTGGTGGGACCCGGCTCACCGTCC
		1489	GAGGTGCAGCTGGTGGAGTCTGGGGGCGGCTTGGCAAAGCCTGGGGGANCCCTGAGACTCTCCTGTGCAGCCTCTGGATTCACCTTCAGTAGCTATGCTATGCACTGGGTCCGCCAGGCTCCAGGGAAGGGGCTGGAGTGGGTCTCAGCTATTAGTAGTGGTGGTAGCACATACTACGCAGACTCCGTGAAGGGCCGATTCACCATCTCCAGAGACAACTCAAAGAACACGCTCTCCCTGCAAATGAACAGCCTGAGAGCTGAGGACACGGCCGTGTATTACTGTGCGAAAGGGACGGGCGTAGTGGTATTTACTGCTATGTATTACTTTGACTACTGGGGCCAGGGAGTCCTGGTCACCGTCTCCTCAG	GACATCCAGATGACCCAGTCTCCATCTTCCTTATCTGCATCTGTAGGAGACAGAGTCACCATCACTTGTCGGGCTAGTCAGACCATTAGCAGTTATTTAGCCTGGTATCAGCAGAAACCAGGGAAAGCCCCTAAGCTCCTGATCTATGCTGCATCCAGTTTGGAAAGTGGGGTCCCATCAAGGTTCAGCGGCAGTGGATCTGGGACAGAATTCACTCTCACCATCAGCAGCCTGCAGCCTGAAGATTTTGCAACTTATTACTGTCAACAGCATAATAGTCACCCGCTCACTTTCGGCGGAGGGACCAAAGTGGAAATCAAAC
		1488	CAGGTGCAGCTGCAGGAGTCGGGCCCNGGACTGGTGAAGCCTTCGGAGACCCTGTCCCTCACCTGCGCTGTCTCTGGTGACTCCATCAGAAGTATTTACTACTGGGGCTGGATCCGTCAGCCCCCGGGGCAGGGACTGGAGTATTTTGGGTACATCAATGGTAATAGTGGGAACACCTACTACAATCCCTCCCTCAAGAGTCGAGTCTCCATTTCAAAAGACACGTCCAAGAACCACTTCTCCCTGAAGCTGAGCTCTGTGACCGCCGCGGACACGGCCGTGTATTATTGTGCGAGACTTGATCGTTCAAGTAGTGTTTTTGACTACTGGGGCCAGGGAGTCCTGGTCACCGTCTCCTCAG	CAGTCTGTGCTGACTCAGCCTCCCTCAATGTCTGGGTCTCCTGGACAGTCGGTCACCATCTCCTGCACTGGAACCAACAGTGACATTGGTGGTTATAACCGTGTCTCCTGGTACCAACAGCACCCAGGCAAAGCCCCCAAAGTCTTGATTTCTGAGGTCACTAAGCGGCCCTCAGGGGTCTCTGATCGCTTCTCTGGCTCCAGGTCTGGCAACACGGCCGCCCTGACCATCTCTGGGCTCCAGGCTGAGGATGAGGCTGATTATTACTGCAGCTCATTTGCAGGCAGCAATACTTACATCTTCGGTCGTGGGACCCGGCTCACCGTCCTAG
		1491	CAGGTGAAGCTGCAGCAGTGGGGCGAAGGACTGGTGAAGCCTTCGGAGACCCTGTCCCTCACCTGCGCTGTCTATGGTGGCTCCATCAGCGGTTACTACTACTGGAGCTGGATCCGCCAGCCCCCAGGGAAGGGACTGGAATGGATTGGCTATATCTATGGTAATAGTGCCAACACCAACTACAACCCCTCCCTCAAGAATCGAGTCACCATTTCAAAAGACACGCCCAAGAACCAGTTCTCCCTAAACCTGAGCTCTGTGACCGCCGCGGACACGGNCNNNTATTACTGTGCGAGAGATCAGCGGGGTGTGGTGCTGGTGTCTGGTACACGGCCCTTTCGTTTCGATGTCTGGGGCCCGGGAGTCCTGGTCACCGTCTCCTCAG	CAGTCTGTGCTGACTCAGCCGCCCTCAGTGTCTGCGGCCCCAGGGCAGAAGGTCACCATCTCCTGCTCTGGAAGCAGCTCCAACATCGGGAGAAGTTATACATCCTGGTATCAGCAGGTCCCAGGAACGGCCCCCAAACTCCTCATCTATGACAATGATAAGCGACCCTCAGGGGTTTCTGACCGATTCTCTGGCTCCAAGTCTGGTACCTCAGCCTCCCTGGCCATCACTGGACTCCAGACTGGAGATGAGGCTGATTATTACTGCGGATCATGGGATATTAGTCTGAGCGCTGGCTTATTCGGAGGAGGGACCCGGCTGACC
		1495	GAGGTGCAGCTGGTGGAGTCTGGGGGANGCTTGGTCCAGCCTGGGGGGTCCCTGAGACTCTCCTGTGCAGCCTCTGGATTCACCTTCAGTGACTACTACATGTACTGGGTCCGCCAGGCTCCAGGAAAGGGGCTGGAGTGGGTGGGTTTCATTAGAAGCAAAGCTTACGGTGGGACAGCAGAATACGCCGCGTCTGTGAAAGGCAGATTCACCATCTCCAGAGATGATTCCAAAAGCATCGCCTATCTGCAAATGAGCAGCCTGAAAACCGAGGACACGGCCGTGTATTACTGCACCACACGTATAGGACAGTATAGCAGCTGGTCTGTTGAAAACTACTTTGACTACTGGGGCCAGGGAGTCCTGGTCACCGTCTC	GAAATTGTAATGACGCAGTCTCCAGCCACCCTGTCTTTGTCTCCAGGGGAAACAGCCACCCTCTCCTGCAGGGCCAGTGAGAGTGTTGGCAGCTACTTAGCCTGGTACCAGCAGAAACCTGGGCAGGCTCCCAGGCTCCTCGTCCATAGTGCATACTTCAGGGCCACTGGCATCCCAGACAGGTTCAGTGGCAGCGGGTCTAGGACAGAGTTCACTCTCACCATTAGCAGCCTGGAGCCTGAAGATGTTGGAGTTTATCACTGTCAGCAGTATAATGACTTGCTCAGTTTTGGCCAGGGGACCAAAGTGGAAATCAAAC
		1536	GAGGTGCAGCTGGTGGAGTCTGGAGGANGCTTGGTCCAGCCTGGGGGGTCCCTGAGACTCTCCTGTGCAGCCTCTGGATTCACCTTCAGTAGCTATGGCATGAGCTGGGTCCGCCAGGCTCCAGGGAAGGGGCTGGAGTGGGTCTCATACATTAGTAATGGTGGTGGTAGCACATACTACGCAGACTCCGTGAAGGGCCGATTCACCATCTCCAGAGACAACTCAAAGAACACGCTCTCCCTGCAAATGAACAGCCTGAGAGCTGAGGACACGGCCGTGTATTACTGTGCGAAAAGTCCCCGGAAATACAGCGGGTACCCCGCACCGGGAGGGTACTTTGACTACTGGGGCCAGGGAGTCCTGGTCACCGTCTCCTCAG	TCCTATGTGCTGACTCAGCCACCCTCGGTGTCAGCGGCCTCAGGACAGACGGCCAGGATCACCTGTGGGGGAGACAACATTGGAAGTAAAAATGTGCACTGGTACCAGCAGAAGCCAGCGCAGGCCCCTGTGCTGGTCATCTATGCTGATAGCAAACGGCCCTCAGGGATCCCTGAGCGATTCTCTGGCTCCAACTCAGGGAACACCGCCACCCTGACCATCAGCAGGGTCGAGGCCGGGGATGAGGCTGACTATTACTGTCAGGTGTGGGACAGTAGTAGTGGCTTATTCGGAGGAGGGACCCGGCTGACCGTCCTAG
		1532	CAGGTGCAGCTGCAGGAGTCGGGCCCAGGACTGGTGAAGCCTCTGGAGACCCTGTCCCTCACCTGCGCTGTCTCTGGTGGCTCTATTAACAGTAACTACTGGAGCTGGATCCGCCAGGCCCCAGGGAAGGGACTGGAGTGGATTGCGTACATCTATGGTAGTGGTAGTAGTACCAACTACAACCCCACCCTCAAGAGTCGAGTCACCCTGTCAGTAGACACGTCCAAGAACCAGTTCTCCCTGAAGCTGAGCTCTGTGACCGCCGCGGACACGGCCGTGTATTACTGTGCGAGAGAGGTCCGGAGATACGATAGTGGTAGTTGGAATTGTTACTTCGAGTTTTGGGGCCAGGGCGCCCTGGTCACCGTCTCCTCAG	CAGTCTGNGNTGACTCAGCCTCGCTCAGTGTCTGGGTCTCCTGGACAGTCGGTCACCATCTCCTGCACTGGAACCAGCAGTGACATCGGTGGTTATAACTATGTCTCCTGGTACCAACAGCATCCAGGCACAGCCCCCAAACTCATGATTTATGCGGTCAGTAAGCGGCCCTCAGGGGTCTCTGATCGCTTCTCTGGCTCCAAGTCTGGCTACACGGCCTCCCTGACCATCTCTGGGCTCCAGGCTGAGGACGAGGCTGATTATTACTGCTGCTCATATGCAGGCACCTACACTTACATCTTCGGTGCTGGGACCCGGCTCACCGTCCTAG
		1538	CAGCTGCAGCTGCAGGAGTCGGGCCCAGGACTGGTGAAGCCTTCGGAGACCCTGTCCCTCACCTGCGCTGTCTCTGGTGGCTCCATCAGCAGTAACTACTGGAGCTGGATCCGCCAGCCCCCAGGGAAGGGACTGGAGTGGATTGGACGTATCTCTGGTAGTGGTGGGAGCACCGACTACAACCCCTCCCTCAAGAGTCGAGTCACCATTTCAACAGACACGTCCAAGAACCAGTTCTCCCTGAAGCTGAGCTCTGTGACCGCCGCGGACACGGCCGTGTATTACTGTGCGAGAGATGATCGAGAATATTGTAGTAGTACTTACTGCTCGGGGTACTTTGACTACTGGGGCCAGGGAGTCCTGGTCACCGTCTCCTCAG	CAGTCTGTGCTGACGCAGCCGCCCTCAGTGTCTGGGGCGCCCGGGCAGAGGGTCACCATCTCCTGCACTGGGAGCAGCTCCAACATTGGAGGTTATTATGTGCAGTGGTACCAGCAGATTCCAGGAACGGCCCCCAAACTCCTCATCTATGAAAATAATAAGCGACCCTCAGGGGTTTCTGATCGATTCTCTGGCTCCCAGTCNGGTACCTCAGCCTCCCTGACCATCACTGGACTCCAGTCTGAGGATGAGGCTGATTATTACTGCCAGTCCTATGACAGCAGCATGAGTGCTCACATATTCGGTGGTGGGACCCGGCTCACCGTCCTAG
		1535	CAGCTGCAGCTGCAGGAGTCGGGCCCAGGACTGGTGAAGCCTTCGGAGACCCTGTCCCTCACCTGCGCTGTCTCTGGTGGCTCCATCAGCAGTAACTACTGGAGCTGGATCCGCCAGCCCCCAGGGAAGGGACTGGAGTGGATTGGACGTATCTCTGGTAGTGGTGGGAGCACCGACTACAACCCCTCCCTCAAGAGTCGAGTCACCATTTCAACAGACACGTCCAAGAACCAGTTCTCCCTGAAGCTGAGCTCTGTGACCGCCGCGGACACGGCCGTGTATTACTGTGCGAGGGAGGGATACTGTACTGGTAGTGGTTGCTCCGCTGAATACTTCGAGTTCTGGGGCCAGGGCGCCCTGGTCACCGTCTCCTC	TCCTATGAGCTGACTCAGCCACCCTCGGTGTCAGTGTCCCCAGGACAGACGGCCAGGATCACCTGTGGGGGAGACAACCTTGGAAGTAAATATGTGCACTGGTACCAGCAGAAGCCAGCGCAGGCCCCTGTGCTGGTCATCTATTATGATAGTGACCGGCCCTCAGGGATCCCTGAGCGATTCTCTGGCTCCAAATCAGGGAACACCGCCACCCTGACCATCAGCGGGGTCGAGGCCGGGGATGAGGCTGACTATTACTGTCAGGTGTGGGACAGTAGTAGTGATTACATCTTCGGTGCTGGGACCCGGCTCACCGTCCTAG
		1524	CAGGTGCAGCTGCAGGAGTCGGGCCCAGGACTGGTGAAGCCTTCGGAGACCCTGTCCCTCACCTGCGCTGTCTCTGGTGGCTCTATCGGCAGTTACTGGTGGGACTGGATCCGTCAGCCCCCAGGGAAGGGACTGGAGTGGATTGGGCATATCAGTAGTGGTGGCAGCAACTCCCTTAATCCGTCCGTCAAGAGTCGAGTCACCCTGTCAGTAGACACGTCCAAGAACCAGTTCTCCCTGAAGCTGAACTCTGTGACCGCCGCGGACACGGCCGTTTATTACTGTGCGAGATCGGAAATTACGAGGATGATTACGGTTACTATAACACACCGCCTATTTGACTACTGGGGCCAGGGAGTCCTGGTCACCGTCTCCTCAG	CAGTCTGTGCTGACTCAGCCGCCCTCAGTGTCTGGGGCGCCCGGGCAGAGGGTCACCATCTCCTGCACTGGGAGCAACTCCAACATTGGAAGTTATTTTGTGCAGTGGTACCAGCAGCTTCCAGGAACGGCCCCCACACTCCTCATATATGAAAATGATAAGCGACCCTCAGGGGTTTCTGATCGATTCTCTGGCTCCCAGTCTGGCACCTCAGCCTCCCTGACCATCACTGGACTCCAGTCTGAGGATGAGGGTGATTATCACTGCCAGTCCTATGACAGCAGTTTGAATACTTACATCTTCGGTGCTGGGACCCGGCTCAGCGTCCTAG
		1526	GAGGTGCAGCTGGTGGAGTCTGGGGGCGGCTTGGCAAAGCCTGGGGGATCCCTGAGACTCTCCTGTGCAGCCTCTGGATTCACCTTCAGTAGCTATGCTATGCACTGGGTCCGCCAGGCTCCAGGGAAGGGGCTGGAGTGGGTCTCAGCTATTAGTAGTGGTGGTAGCACATACTACGCAGACTCCGTGAAGGGCCGATTCACCATCTCCAGAGACAACTCAAAGAACACGCTCTCCCTGCAAATGAACAGCCTGAGAGCTGAGGACACGGCCGTGTATTACTGTGCGAAAGTGACCTCTTCACGGGCGGGGCCGGGACGGACCTCTGACTACTGGGGCCAGGGAGTCCTGGTCACCGTCTCCTCAG	CAGGCTGTAGTGACTCAGGAGCCCTCACTGACTGTGTCCCCAGGAGGGACAGTCACTCTCACCTGTGCTTCCAGTACTGGAGCAGTCACCAGTGGTCACTATCCACACTGGTTCCAGCAGAAACCTGGACAAGCCCCCAAGACACTGATTTATGATACAAGCAACAAGCTCTCCTGGACCCCTGCCCGGTTCTCAGGCTCCCTTGCTGGGGGTAAAGCTGCCCTGACACTTTCGGGTGCGCAGCCCGAGGACGAGGCTGAGTATTACTGCTGGCTGTACTACAGTGGTGCTTGGGTATTCGGCGGAGGGACCCGGCTGACCGTCCTAG
		1528	CAGGTGCAGCTGCAGGAGTCGGGCCCAGGACTGGTGAAGCCTTCGGAGACCCTGTCCCTCACCTGCAGTATCTCTGGTGTCTCCATCGTTACTGAATGGTGGAGTTGGATCCGCCAGGCCCCCGGGAAGGGACTGGAGTGGATTGGAGAAATTGATGGTAGAGGAGGGCGCACCAACTACAACCCCTCCCTCAAGAGTCGAGTCATAATTTTAGAAGACGCATCCAAGAACGAGATCTCACTGAGGTTATTCTCTGTGACCGCCGCGGACACGGCCGTCTATTACTGTGCGAGATGTCAGCGTGACTACTGGGGCAAGGGACTCCTGGTCACCGTCTCCTC	CAGTCTGTGCTGACTCAGCCTCCCTCAGCGTCTGAGGCCGCCAGGAAGAGTGTCACCATCTCCTGTTCTGGAAGCAGCTCCAACATCGGAAGTAATAGTGTATCCTGGTACCAGCAGTTCCCAGGAACAGCTCCCAAACTCCTCATCTATTATTATGATCAACGAGCCTCAGGTGTCTCTGACCGATTCTCTGGCTCCAAGTCTGGCACGTCAGCCTCCCTGGCCATCAGTGGGCTCCAGACCGAGGATGAGGCTGATTATTACTGCGCAGCATGGGATGATAGCCTGAGCGGTTTCATCTTCGGTGCTGGGACCCGCCTCACCGTCCTAG
		1534	CAGGTGCAGCTGCAGGAGTCGGGCCCAGGACTGGTGAAGCCTTCGGAGACCCTGTCCCTCACCTGCGCTGTCTCTGGTGGCTCCATCAGCAGTGGTTACTACTACTGGAGCTGGATCCGCCAGCCCCCAGGGAAGGGACTGGAGTGGATTGGGTACATCACTTATAGTGGGAGCACCAGCTACAACCCGTCCCTCAAGAGTCGAGTCACCATTTCAAGAGACACGTCCAAGAACCAGTTCTCCCTGAAGCTGAGCTCTGTGACCGCCGCGGACACGGCCGTGTATTACTGTGCGAGAGAGGGGGGGGGATCCGAATACAGTAATCCGATGTACTACTTTGACTACTGGGGCCAGGGAGTCCTGGTCACCGTCTCCTCAG	CAGCCTGTGCTGACTCAGTCGCCTTCTGCCTCTGCCTCCCTGGGAGCCTCGGTCAAGCTCACCTGCACTCTGAGCAGTGGGCACAGTAGCTACAACATCGCATGGCATCAGCAGCAGCAAGGGAAGGCCCCTCGGTACTTGATGTGGCTTAAAAGTGATGGCAGCCACAGCAAGGGGGATGGGATCCCTGATCGTTTCTCAGGCTCCAGCTCCGGGGCTGAGCGCTACCTCACCATCTCCAACCTCCAGTCTGAGGATGAGGCTGATTATTACTGTCAGACCTGGACTACTGGCATTCGGGTATTCGGCGGAGGGACCCGGCTGACCGTCCTAG
		1548	CAGGTGCAGCTGCAGGAGTCGGGCCCAGGAGTGGTGAAGCCTTCGGAGACCCTGTCCCTCACCTGCGCTGTCTCTGGTGGCACCATCAGCAGTGGTTACTACTACTGGAGCTGGATCCGCCAGCCCCCAGGGAAGGGGCTGGAGTGGATTGGGGGTATCTATAGTAATAGTGAGAGTACCAACTACAACCCCTCCCTCAAGAGTCGAGTCACCATTTCAAAAGACACGTCCAAGAACCAGTTCTCCCTAAAGCTGAGCTCTGTGACCGCCACGGACACGGCCGTGTATTACTGTGCGAGAGTGCCCCTCATTTACCCCACGTTTGACTACTGGGGCCAGGGAGTCCTGGTCACCGTCTCCTCAG	GAGTCTGNGCTGACTCAGGAGCCATCGTTGTCAGTGTCCCCTGGAGGAACAGTCACACTCACCTGTGGCCTGAGCTCTGGCTCAGTCTCTACCAGTAACTACCCCAGCTGGTACCAGCAGACCCCAGGCCAGGCTCCACGCACGCTCGTCTACAGAACAAACACTCGCCCTTCTGGGGTCCCTGATCGCTTCTCTGGCTCCATCCTTGGGAACAAAGCTGCCCTCACCATCACGGGGGCTCAGGCAGACGATGAATCTGATTATTACTGTACGCTCTACATGGGTAGTGGCATTTGGGTATTCGGCGGAGGGACCCGGCTGACCGTCCTAG
		1530	CAGGTGCAGCTGCAGGAGTCGGGCCCAGGACTGGTGAAGCCTTCGGAGACCCTGTCCCTCACCTGCGCTGTCTCTGGTGGCTCCATCAGCAGTGGTTCCTACTTCTGGAACTGGATCCGCCAGCCCCCAGGAAAGGGACTGGAGTGGATTGGGTTCATCACTTATAGCGGGACCACCAGCTACAACCCGTCCCTCAAGAGTCGAGTCACCATTTCAAGAGACACGTCCAAGAACCAGTTCTCCCTGAAGCTGAACTCTGTGACCGCCGCGGACACAGCCGTGTATTTCTGTGCGCAAGAGAGTTGGAACGTCGTCTGGCACACAAGGAGTTCGGTGTATTTCTTTGAGTATTGGGGCCAGGGAGTCCTGGTCACCGTCTCCTCAG	TCCTATGTGCTGACTCAGCCACGCTCAGTGTCCGTGTCCCCAGGACAGACGGCCAGGATCACCTGTGGGGGAGACAACATTGGAGATAAAAGTGTGCAGTGGTACCAGCAGAAGCCACCGCAGGCCCCTGTACTGGTCATCTATGCTGACAGCGAACGGCCCTCAGGGATCCCTGAGCGATTCTCTGGCTCCAAGTCAGGGAACACCGCCACCCTGACCATCAGCGGGGTCGAGGCCGGGGATGAGGCTGACTATTACTGTCAGGTGTGGGACAGTAGTAGTGATCGCTTATTCGGAGGAGGGACCCGGCTGACCGTCCTAG
		1544	CAGGTGCAGCTGCAGGAGTCGGGCCCAGGACTGGTGAAGCCTTCAGAGACCCTGTCCCTCACCTGCGCTGTCTCTGGAGGCTCTATCAGCGGTGGTTATGACTGGAGCTGGATCCGCCAGCCCCCAGGGAAGGGGCTGGAGTGGATTGGGTATATCTATGGTAGTAGTGGGAGCACCAACTACAACCCGTCCCTCAAGAATCGAGTCACCATTTCAAAAGACACGTCCAAGAACCAGTTCTCCCTGAAGCTGAGCTCTGTGACCGCCGCGGACACGGCCGTGTATTACTGTGCGAGACGGATCCAATACTGTACTGGTAGTGGTTGCGAAGAATTGGAGTACTACTTTGACTACTGGGGCCAGGGAGTCCTGGTCACCGTCTCCTCAG	TCCTATGAGCTGACTCAGCCACCCTCGGTGTCGGTGTCCCCAGGACAGATGGCCAGGATCACCTGTGGGGGAGACAACATTGGAAGTAAAAATGTGCAGTGGTACCAGCAGAAGCCAGCGCAGGCCCCTGTGCTGGTCATCTATGCTGATAGCGAACGGCCCTCAGGGATCCCTGAGCGATTCTCTGGCTCCAACTCAGGGAACACGGCCACCCTGACCATCAGCGGGGTCGAGGCCGGGGATGAGGCTGACTATTACTGTCAGGTGTGGGATAGTAGTAGTGATCATTACATCTTCGGTGCTGGGACCCGGCTCACCGTCCTAG
		1542	CAGGTGCAGCTGCAGGAGTCGGGCCCAGGACTGGTGAAGCCTTCGGAGACCCTGTCCCTCACCTGCGCTGTGTCTGGTGACTCCATCAGCGGCTCCTTCTGGAACTGGATCCGCCAATCCCCAGGGAAGGGACTGGAGTGGATTGGCTTTGTCGGAGGTAGTAGTGGGGCCACCGACTACAATCCCTCCCTCAAGAGTCGAGTCACCATTTCAACGGACATGTCCAAGAACCAAGTCTCCCTGAGGTTGGACTCTATGACCGCCGCGGACACGGCCGTGTATTATTGTGCGAGAGACAGGACGGGCCAGTATTGTAGTGGGACTTACTGTTCTTCCAAGTTTGACTACTGGGGCCAGGGAGTCCTGGTCACCGTCTCCTCAG	CAGCCTGTGCTGACTCAGCCAACCTCCCTCTCAGCATCTCCTGGAGCTTCAGCCAGACTCACCTGCACCTTGCGCAGTGGCATCAGTGTTGGTGATTACAGGATATACTGGTACCAGCAGAAGACAGGGAGTCCTCCCCGGTATCTTCTGAACTACCACACAGGCTCAGATAAACACCAGGGATCTGGAGTCCCCAGCCGCTTCTCTGGATCCAAAGATGTTTCGGCCAATGCTGGGATTTTACTCATCTCTGGACTCCAGTCTGAGGATGAGGCTGACTATTACTGTTTGGTTTACCACAACAGTGCGTACATCTTCGGTGTTGGGACCCGTCTCACCGTCCTAG
		1541	GAGGTGCAGCTGGTGGAGTCTGGGGGCGGCTTGGCTAAGCCTGGGGGGTCCCTGAGACTCTCCTGTGTAGTGTCTGGATTCAACTTCAATGGCTACGTCATGTACTGGGTCCGCCAGGCTCCAGGGAAGGGGCTGGAGTGGGTCTCAGGTATAGGTTATACTGGAGGTAACACATACTACGCAGACTCCGTGAAGGGCAGATTCAGCATTTCCAGAGACAACGCCAAGAACACACTGTATCTTCAAATGGACAGCCTGAAAACTGAAGACACGGCTGTCTATTACTGTGCGAGAGATTCGATTCCTCGTGACTATCGGTTCGATGTCTGGGGCCCGGGAGTCCTGGTCACCGTCTCCTCAG	CAGTCTGTGCTGACTCAGCCTCCCTCAATGTCTGGGTCTCCTGGACAGTCGGTCACCATCTCCTGCACTGGAACCAGCAGTGACATTGGTGCTTTTAATCGTGTCTCCTGGTACCAACAGCACCCAGGCAAAGCCCCCAAACTCATGATTTATGAGGTCAGTAGGCGGCCCCCAGGGGTCTCTGATCGCTTCTCTGGCTCCAAGTCTGGCAACACGGCCTCCCTGACCATCTCTGGGCTCCAGGCTGAGGATGAGGCTGATTATTACTGCAGTTCATATGGAGGCTACAACACTTTCATCTTCGGTTCTGGGACCCGGCTCACCGTCCTAG

## Sheet: Features
		Ab ID	VH gene	nt_Mut	CDRH3	Length	VL gene	nt_Mut	CDL3
		1485	IGHV4_2M	33	VRGPNHWEYFDSGNNEYFEF	20	IGLV124*30	25	QSYDSGLRSYI
		1508	IGHV3_45	24	VRDSIPRDYRFDG	13	IGLV2-7*01	17	NSYAGTNTFI
		1490	IGHV3_45	27	VRDSIPRDYRFDG	13	IGLV2-7*01	7	NSYAGTDTFI
		1489	IGHV3_45	1	AKGTGVVVFTAMYYFDY	17	IGKV1S5*01	3	QQHNSHPLT
		1488	IGHV4_11	16	ARLDRSSSVFDY	12	IGLV2-7*01	10	SSFAGSNTYI
		1491	IGVH4_11	11	ARDQRGVVLVSGTRPFRFDV	20	IGLV1S6*01	5	GSWDISLSAGL
		1495	IGHV3_6	3	TTRIGQYSSWSVENYFDY	18	IGKV3S1*01	1	QQYNDLLS
		1536	IGHV3_45	1	AKSPRKYSGYPAPGGYFDY	19	IGLV3-6*01	1	QVWDSSSGL
		1532	IGHV4_11	8	AREVRRYDSGSWNCYFEF	18	IGLV2-3*01	5	CSYAGTYTYI
		1538	IGHV4_2	0	ARDDREYCSSTYCSGYFDY	19	IGLV1-7*01	2	QSYDSSMSAHI
		1535	IGHV4_2	0	AREGYCTGSGCSAEYFEF	18	IGLV3-1*01	0	QVWDSSSDYI
		1524	IGHV4_6B	14	ARSEITRMITVTITHRLFDY	20	IGLV1-7*01	10	QSYDSSLNTYI
		1526	IGHV3_45	0	AKVTSSRAGPGRTSDY	16	IGLV7-2*01	0	WLYYSGAWV
		1528	IGHV4_11	37	ARCQRDY	7	IGLV1-15*01	2	AAWDDSLSGFI
		1534	IGHV4_11	0	AREGGGSEYSNPMYYFDY	18	IGLV4S2*01	4	QTWTTGIRV
		1548	IGHV4_4R	0	ARVPLIYPTFDY	12	IGLV8-1*01	7	TLYMGSGIWV
		1530	IGHV4_11	10	AQESWNVVWHTRSSVYFFEY	20	IGLV3-1*01	4	QVWDSSSDRL
		1544	IGHV4_11	0	ARRIQYCTGSGCEELEYYFDY	21	IGLV124*42	2	QVWDSSSDHYI
		1542	IGHV4_11	24	ARDRTGQYCSGTYCSSKFDY	20	IGLV5-11*01	10	LVYHNSAYI
		1541	IGHV3_45	20	ARDSIPRDYRFDV	13	IGLV2-7*01	8	SSYGGYNTFI
